# Supplementary material for: The GluTR-binding protein is the heme-binding factor for feedback control of glutamyl-tRNA reductase
Source: eLife. 2019 Jun 13;8:e46300. doi: 10.7554/eLife.46300 (PMC6597238; doi:10.7554/eLife.46300)
Supplement: Supplementary file 2. [file elife-46300-supp2.xlsx]

## Sheet: pigments
molecule(s)	Violaxanthin, Neoxanthin, Antheraxanthin, Lutein, Zeaxanthin,
	Chlorophyll a, Chlorophyll b, beta-carotin
name of methode:		Pigments
column:	Prontosil C30 250x4,6 mm 3µm
detektor and wavelength:		DAD 440 nm
mobile phase:
A	90% ACN 10% H2O 0,1% Triethylamine
B
C	100% Ethylacetate
D
thermostated column compartment:			21°C
flow rate:		1,2ml/ min
length of methode:		23 min
run timetable:		time/min	A	B
		0	100	0
		1	70	30
		19	0	100
		20	0	100
		20.1-23	100	0

## Sheet: PChlide
molecule(s)	Chlorophyllide
	Protochlorophyllide
name of methode:		Pchlide
column:		Waters Nova Pak C18 3,9x150mm 4µm
detector and wavelength:		DAD 430 nm	Chlide
		FLD Ex.435 nm Em.644 nm Pchlide
mobile phase:
A		20% 1M Ammoniumacetate pH 7,0 + 80% Methanol
B		100 % Methanol
C
D
termostated column compatment:		20°C
flow rate:		1ml/min
length of methode:		18 min
run timetable:		time / min	% A	% B
		0	100	0
		5	50	50
		7	0	100
		12	0	100
		13.1 - 18	100	0

## Sheet: Proto IX
molecule(s)	protoporphyrin IX
name of methode:		ProtoIX
column:	Waters Nova Pak C18		4µm	3,9x150mm
detector and wavelength:		FLD	Ex. 405 nm	Em. 637 nm
mobile phase:
A
B	10% 1M ammoniumacetate pH 5.2 90% methanol
C
D	100% ethylacetate
thermostated column compartment:			20°C
flow rate:		0.5ml/min
length of methode:		12 min
run timetable:		time/min	%B	%D
		4	90	10
		4.1	0	100
		8	0	100
		8.1 - 12	90	10

## Sheet: Heme
molecule(s)	heme
name of methode:		heme
column:	Poroshell 120, EC-C18-2,7µm, 3,0x100
detector and wavelength:		DAD	398 nm
mobile phase:
A1	water pH 3,2 (with acetic acid)
B1	100% Methanol
C
D
thermostated column compartment:			40°C
flow rate:		0.7 ml/min
length of methode:		8 min
run timetable:		time/min	A1	B1
		2.5	40	60
		2.6	10	90
		6	10	90
		6.1	40	60
